# Supplementary material for: Integrating susceptibility maps of multiple hazards and building exposure distribution: a case study of wildfires and floods for the province of Quang Nam, Vietnam
Source: Copernicus journal article supplement (doi:10.5194/nhess-24-4385-2024), 2024-12-05
Supplement: Supplementary file 1 [file nhess-24-4385-2024-supplement.zip]

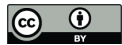

## *Supplement of*

# **Integrating susceptibility maps of multiple hazards and building exposure distribution: a case study of wildfires and floods for the province of Quang Nam, Vietnam**

**Chinh Luu et al.**

*Correspondence to:* Chinh Luu ([chinhltu@huce.edu.vn](mailto:chinhltu@huce.edu.vn))

- [nhess-24-4385-2024-supplement-title-page.pdf](#)
- [Data\\_add\\_paper](#)
  - [Mutiple\\_hazard.cpg](#)
  - [Mutiple\\_hazard.dbf](#)
  - [Mutiple\\_hazard.prj](#)
  - [Mutiple\\_hazard.sbn](#)
  - [Mutiple\\_hazard.sbx](#)
  - [Mutiple\\_hazard.shp](#)
  - [Mutiple\\_hazard.shp.xml](#)
  - [Mutiple\\_hazard.shx](#)
  - [Susceptibility\\_FireForest.tfw](#)
  - [Susceptibility\\_FireForest.tif](#)
  - [Susceptibility\\_FireForest.tif.aux.xml](#)
  - [Susceptibility\\_FireForest.tif.ovr](#)
  - [Susceptibility\\_FireForest.tif.vat.cpg](#)
  - [Susceptibility\\_FireForest.tif.vat.dbf](#)
  - [Susceptibility\\_Flood.tfw](#)
  - [Susceptibility\\_Flood.tif](#)
  - [Susceptibility\\_Flood.tif.aux.xml](#)
  - [Susceptibility\\_Flood.tif.ovr](#)
  - [Susceptibility\\_Flood.tif.vat.cpg](#)
  - [Susceptibility\\_Flood.tif.vat.dbf](#)
  - [Test\\_FireForest.cpg](#)
  - [Test\\_FireForest.dbf](#)

- Test\_FireForest.prj
- Test\_FireForest.sbn
- Test\_FireForest.sbx
- Test\_FireForest.shp
- Test\_FireForest.shp.xml
- Test\_FireForest.shx
- Test\_Flood.cpg
- Test\_Flood.dbf
- Test\_Flood.prj
- Test\_Flood.sbn
- Test\_Flood.sbx
- Test\_Flood.shp
- Test\_Flood.shp.xml
- Test\_Flood.shx
- Train\_FireForest.cpg
- Train\_FireForest.dbf
- Train\_FireForest.prj
- Train\_FireForest.sbn
- Train\_FireForest.sbx
- Train\_FireForest.shp
- Train\_FireForest.shp.xml
- Train\_FireForest.shx
- Train\_Flood.cpg
- Train\_Flood.dbf
- Train\_Flood.prj
- Train\_Flood.sbn
- Train\_Flood.sbx
- Train\_Flood.shp
- Train\_Flood.shp.xml
- Train\_Flood.shx
- desktop.ini
- flood\_RF\_21\_c.lyr
- rf\_ff\_2410.lyr

The copyright of individual parts of the supplement might differ from the article licence.
